# Supplementary material
Source: Springer Nature journal article supplement (https://www.springermedizin.de/resource/supplementary/12879_2013_3077_MOESM1_ESM.pdf/9445978)
Supplement: MOESM1 [file 9445978]

**FIGURE S1:** Patients characteristics

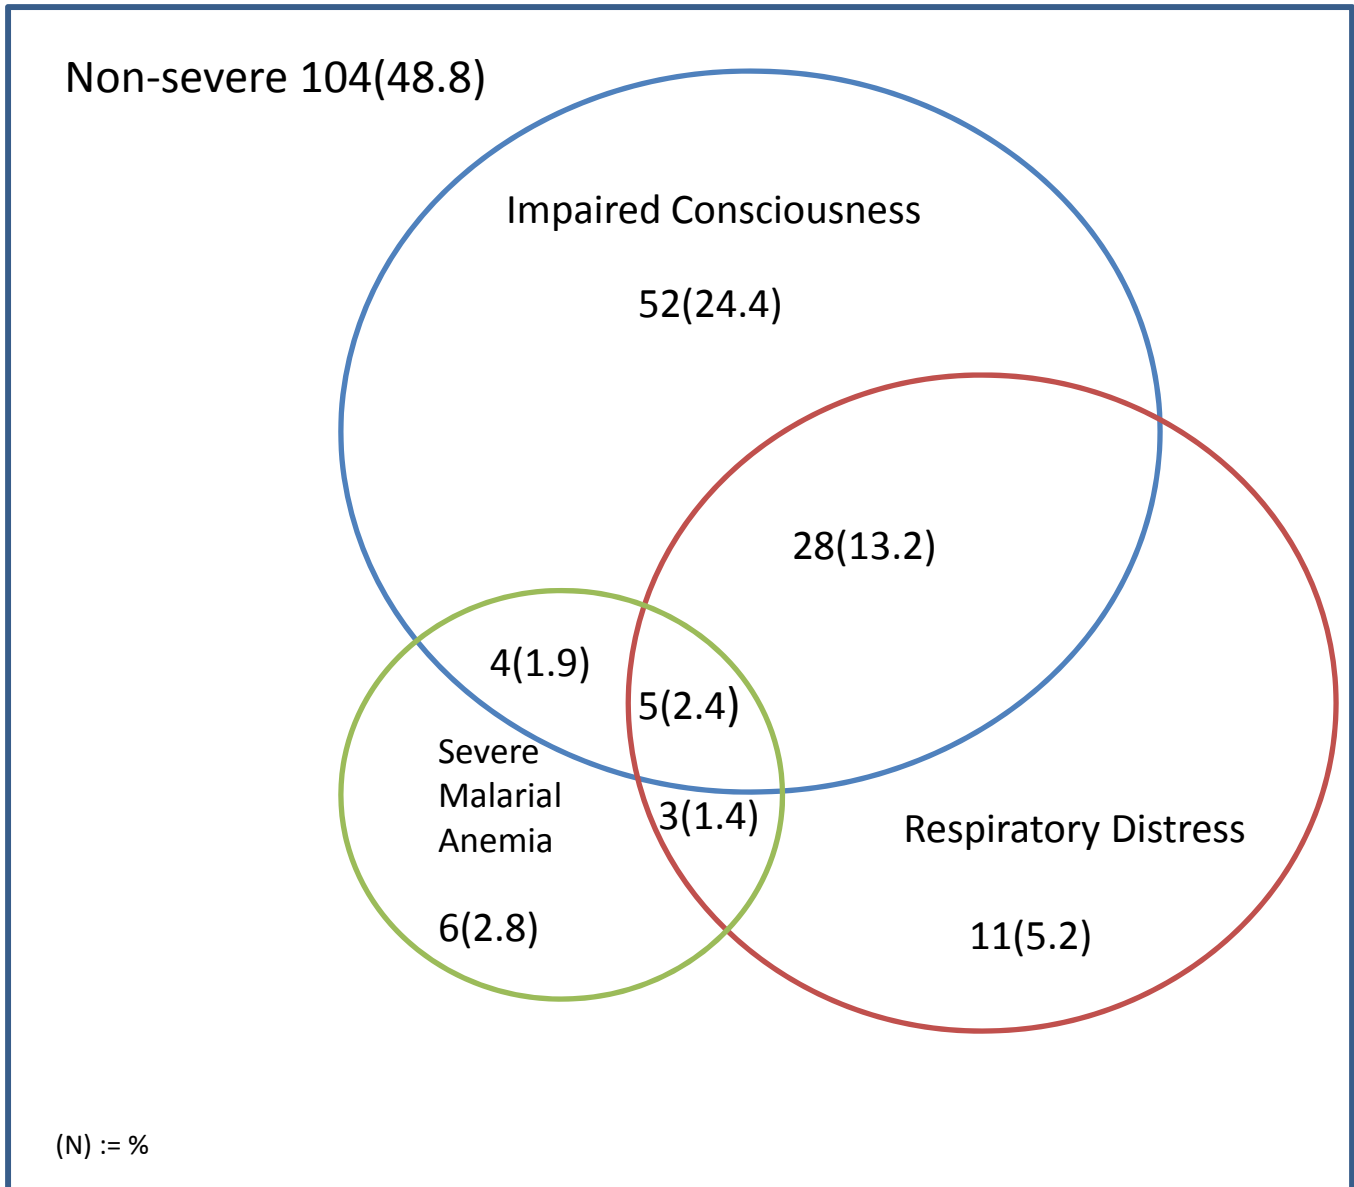

Venn diagram showing the clinical syndromes of the study subjects. IC = 89(41.8) of which CM= 61(28.6), RD=47(22.1) SMA = 18(8.4), and Non-severe=104(48.8)

FIGURE S2:

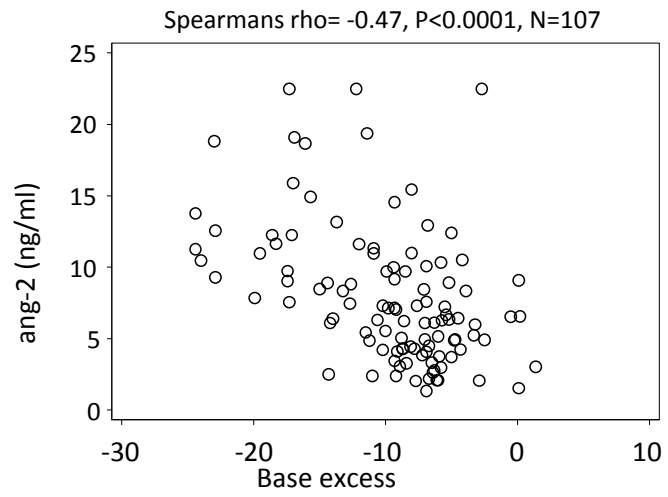

The relationship between ang-2 and base-excess
